# Supplementary material
Source: Springer Nature journal article supplement (https://www.springermedizin.de/resource/supplementary/12889_2013_5876_MOESM2_ESM.pdf/9496412)
Supplement: MOESM2 [file 9496412]

**Table S2** Univariate logistic regression derived odds ratios (and 95% Confidence Intervals) for the association between sample characteristics and immunization with all 5 traditional vaccines (DTP/DTaP, OPV/IPV, MMR, Hib, HBV)

|                                                                       | Complete immunization (n=731) | Age appropriate immunization at the age of |                               |
|-----------------------------------------------------------------------|-------------------------------|--------------------------------------------|-------------------------------|
|                                                                       |                               | 12 months (n=731)                          | 24 months (n=704)             |
| <i>Actual age</i>                                                     | 0.37 (0.30-0.45) <sup>b</sup> | 0.77 (0.64-0.92) <sup>a</sup>              | 0.79 (0.65-0.95) <sup>a</sup> |
| <i>Father's nationality</i>                                           |                               |                                            |                               |
| Other                                                                 | Reference                     |                                            |                               |
| Greek                                                                 | 1.51 (1.10-2.08) <sup>a</sup> | 1.38 (0.93-2.05)                           | 3.33 (2.39-4.64) <sup>b</sup> |
| <i>Number of children</i>                                             |                               |                                            |                               |
| 1                                                                     | Reference                     |                                            |                               |
| 2                                                                     | 1.01 (0.71-1.44)              | 1.57 (1.00-2.45) <sup>a</sup>              | 1.01 (0.70-1.45)              |
| ≥ 3                                                                   | 1.04 (0.66-1.64)              | 1.52 (0.87-2.66)                           | 0.71 (0.44-1.13)              |
| <i>Maternal education</i>                                             |                               |                                            |                               |
| High school or less                                                   | Reference                     |                                            |                               |
| College/University                                                    | 0.95 (0.70-1.27)              | 1.24 (0.87-1.77)                           | 1.36 (1.00-1.86) <sup>a</sup> |
| <i>Use of multivalent vaccines</i>                                    |                               |                                            |                               |
| ≤ 4-valent                                                            | Reference                     |                                            |                               |
| 5- or 6-valent                                                        | 1.86 (1.37-2.52) <sup>b</sup> | 3.36 (2.17-5.18) <sup>b</sup>              | 3.74 (2.72-5.16) <sup>b</sup> |
| <i>Impact of vaccine cost on the decision to vaccinate</i>            |                               |                                            |                               |
| No                                                                    | Reference                     |                                            |                               |
| Yes                                                                   | 0.95 (0.57-1.60)              | 0.81 (0.42-1.55)                           | 0.40 (0.23-0.68) <sup>b</sup> |
| <i>Impact of insurance reimbursement on the decision to vaccinate</i> |                               |                                            |                               |
| No                                                                    | Reference                     |                                            |                               |
| Yes                                                                   | 1.01 (0.73-1.37)              | 1.13 (0.78-1.64)                           | 0.76 (0.55-1.05)              |
| <i>Place of vaccination</i>                                           |                               |                                            |                               |
| Private pediatrician                                                  | Reference                     |                                            |                               |
| Insurance doctor or clinic/<br>Public health clinic                   | 1.15 (0.84-1.56)              | 1.21 (0.83-1.77)                           | 0.86 (0.62-1.18)              |
| <i>Type of insurance</i>                                              |                               |                                            |                               |
| IKA                                                                   | Reference                     |                                            |                               |
| Other                                                                 | 1.27 (0.94-1.72)              | 1.68 (1.18-2.38) <sup>a</sup>              | 2.10 (1.52-2.90) <sup>b</sup> |

DTP/DTaP: diphtheria, tetanus, pertussis/ acellular pertussis vaccine; OPV/IPV: live attenuated/inactivated polio vaccine; HBV: hepatitis B vaccine; MMR: measles, mumps, rubella vaccine; Hib: haemophilus influenzae type b vaccine.

<sup>a</sup> p< 0.05, <sup>b</sup> p< 0.001; IKA: Social Security Institute.

**Table S3** Univariate logistic regression derived odds ratios (and 95% Confidence Intervals) for the association between sample characteristics and immunization with all 3 newer vaccines (MenC, PCV7, Var)

|                                                                       | Complete immunization (n=731) | Age appropriate immunization at |                                |
|-----------------------------------------------------------------------|-------------------------------|---------------------------------|--------------------------------|
|                                                                       |                               | 12 months (n=731)               | 24 months (n=704)              |
| <i>Actual age</i>                                                     | 0.75 (0.64-0.89) <sup>a</sup> | 0.46 (0.35-0.60) <sup>b</sup>   | 0.42 (0.28-0.65) <sup>b</sup>  |
| <i>Father's nationality</i>                                           |                               |                                 |                                |
| Other                                                                 | Reference                     |                                 |                                |
| Greek                                                                 | 1.25 (0.91-1.72)              | 2.80 (1.35-5.78) <sup>a</sup>   | 3.57 (1.24-10.25) <sup>a</sup> |
| <i>Number of children</i>                                             |                               |                                 |                                |
| 1                                                                     | Reference                     |                                 |                                |
| 2                                                                     | 0.98 (0.69-1.39)              | 0.59 (0.33-1.05)                | 0.44 (0.21-0.91) <sup>a</sup>  |
| ≥ 3                                                                   | 0.93 (0.59-1.46)              | 0.54 (0.24-1.21)                | 0.36 (0.12-1.11)               |
| <i>Maternal education</i>                                             |                               |                                 |                                |
| High school or less                                                   | Reference                     |                                 |                                |
| College/University                                                    | 0.85 (0.63-1.15)              | 0.98 (0.58-1.67)                | 0.58 (0.27-1.22)               |
| <i>Use of multivalent vaccines</i>                                    |                               |                                 |                                |
| ≤ 4-valent                                                            | Reference                     |                                 |                                |
| 5- or 6-valent                                                        | 0.24 (0.92-1.68)              | 5.03 (2.26-11.21) <sup>b</sup>  | 3.05 (1.25-7.46) <sup>a</sup>  |
| <i>Impact of insurance reimbursement on the decision to vaccinate</i> |                               |                                 |                                |
| No                                                                    | Reference                     |                                 |                                |
| Yes                                                                   | 1.06 (0.77-1.44)              | 1.06 (0.61-1.84)                | 0.97 (0.47-1.98)               |
| <i>Place of vaccination</i>                                           |                               |                                 |                                |
| Private clinic                                                        | Reference                     |                                 |                                |
| Insurance doctor or clinic / Public health clinic                     | 1.35 (0.99-1.85)              | 0.94 (0.54-1.64)                | 0.74 (0.67-1.48)               |
| <i>Type of insurance</i>                                              |                               |                                 |                                |
| IKA                                                                   | Reference                     |                                 |                                |
| Other                                                                 | 1.30 (0.96-1.75)              | 1.82 (1.08-3.07) <sup>a</sup>   | 1.58 (0.80-3.13)               |

Men C: conjugated meningococcal C vaccine; PCV7: conjugated pneumococcal 7-valent vaccine; Var: varicella vaccine.

<sup>a</sup> p< 0.05, <sup>b</sup> p< 0.001; IKA: Social Security Institute.
